# Supplementary material for: Effect of heat-treated flaxseed lignan macromolecules on the interfacial properties and physicochemical stability of α-linolenic acid-enriched O/W emulsions
Source: Royal Society of Chemistry journal article supplement (doi:10.1039/d4fo02663b), 2024-01-01

Supplementary materials

Fig. S1 The chromatogram of FLM detected using UPLC at 280 nm

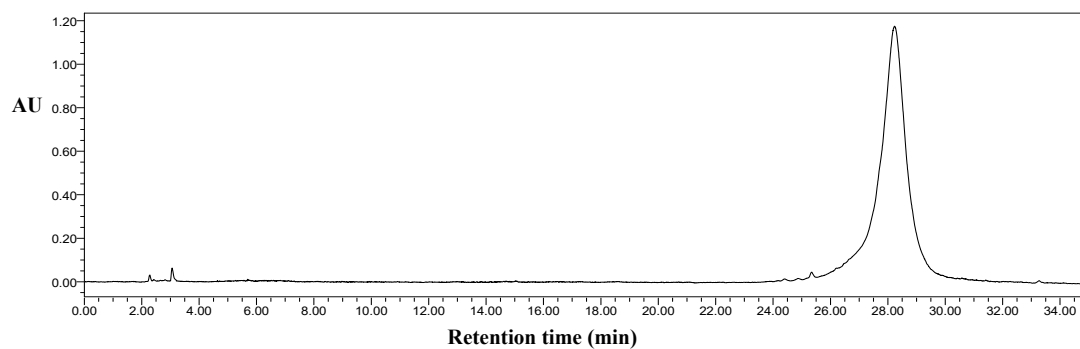

Fig. S2: The FT-IR signals of FLM and FLM and its heat-treated FLM after being normalized

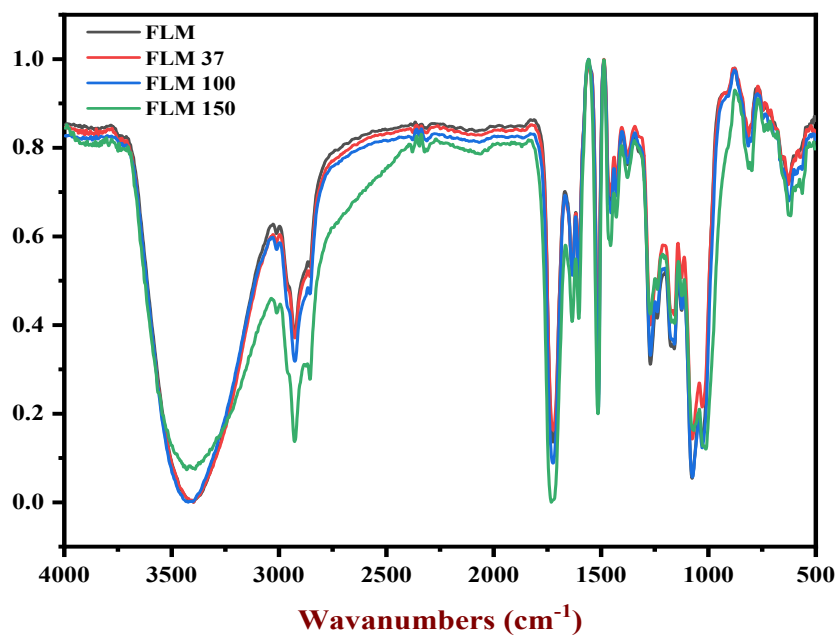

Supplement: d4fo02663b1.pdf [file d4fo02663b1.pdf]
